# Supplementary material
Source: MDPI journal article supplement (https://www.mdpi.com/2673-3994/5/2/8)
Supplement: s1 [file s1]

Table S1. GREET land-use parameters

| GREET Parameter                                      | Value             |
|------------------------------------------------------|-------------------|
| Select Corn Ethanol Case                             | Corn Ethanol 2011 |
| Select Domestic Emissions Modeling Scenario          | Century           |
| Select International Emissions Modeling Scenario     | Winrock           |
| Domestic Emissions Modeling Scenario                 | yield increase    |
| Soil depth considered in modeling                    | 100 cm            |
| Harvested Wood Product (HWP) Scenario                | HEATH             |
| Tillage Practice for Corn and Corn Stover Production | Conventional Till |
| Forest Prorating Factor                              | Yes               |

Table S2. Transportation modes and distances for selected products.

| Source              | Destination   | Mode               | Distance (km) | Component or Commodity          |
|---------------------|---------------|--------------------|---------------|---------------------------------|
| Japan Case Study    |               |                    |               |                                 |
| Middle East         | Japan         | Ocean Going Vessel | 12000         | Gasoline BOB                    |
| US Gulf Coast       | Japan         | Ocean Going Vessel | 16000         | ETBE, EtOH                      |
| US Midwest          | US Gulf Coast | Barge              | 2300          | EtOH                            |
| Brazil              | US Gulf Coast | Ocean Going Vessel | 8000          | EtOH for ETBE                   |
| Japan               | Japan         | Truck              | 10            | E10                             |
| Japan               | Japan         | Pipeline           | 10            | ETBE blend                      |
| Colombia Case Study |               |                    |               |                                 |
| US Gulf Coast       | Colombia      | Ocean Going Vessel | 3000          | BOBs, ETBE, US Ethanol          |
| US Midwest          | US Gulf Coast | Barge              | 2300          | EtOH for ETBE                   |
| Cali, Colombia      | US Gulf Coast | Ocean Going Vessel | 3000          | EtOH for ETBE                   |
| Cali, Colombia      | Colombia      | Truck              | 550           | EtOH                            |
| Colombia            | Colombia      | Truck              | 10            | Finished (oxygenated) gasolines |
| Europe Case Study   |               |                    |               |                                 |
| Middle East         | France        | Ocean Going Vessel | 8100          | Gasoline BOB                    |
| France              | France        | Truck              | 50            | E10, ETBE                       |



Table S5. Composition of modeled fuel blends for France 95 RON

| Oxygen Wt %: | 0     | 3.7%  |              |        | 5.2%  |               |              |        | 6.9%  |               |               |              |        | 8.0%  |              |               |               |              |        |
|--------------|-------|-------|--------------|--------|-------|---------------|--------------|--------|-------|---------------|---------------|--------------|--------|-------|--------------|---------------|---------------|--------------|--------|
| Blend:       | E0    | E10   | E5ETB<br>E12 | ETBE24 | E15   | E10ETB<br>E11 | E5ETB<br>E22 | ETBE33 | E20   | E15ETB<br>E11 | E10ETB<br>E22 | E5ETB<br>E33 | ETBE44 | E23   | E20ETB<br>E7 | E15ETB<br>E18 | E10ETB<br>E29 | E5ETB<br>E40 | ETBE51 |
| Reformate %  | 62.3% | 36.4% | 29.4%        | 23.2%  | 30.8% | 24.6%         | 18.3%        | 12.1%  | 24.4% | 18.2%         | 12.0%         | 5.7%         | 6.3%   | 20.6% | 16.9%        | 10.7%         | 4.4%          | 4.9%         | 0.1%   |
| Naphtha %    | 1.4%  | 3.7%  | 7.6%         | 11.1%  | 7.4%  | 10.8%         | 14.4%        | 17.9%  | 11.5% | 15.0%         | 18.5%         | 22.0%        | 29.1%  | 14.0% | 16.0%        | 19.5%         | 23.1%         | 30.1%        | 34.4%  |
| Other Gas %  | 36.4% | 49.3% | 45.5%        | 42.2%  | 46.9% | 43.5%         | 40.2%        | 36.8%  | 44.1% | 40.8%         | 37.4%         | 34.0%        | 20.2%  | 42.4% | 40.5%        | 37.1%         | 33.7%         | 20.0%        | 14.5%  |
| ETBE %       | -     | -     | 12.4%        | 23.5%  | -     | 11.0%         | 22.2%        | 33.3%  | -     | 11.0%         | 22.1%         | 33.3%        | 44.4%  | -     | 6.6%         | 17.7%         | 28.8%         | 39.9%        | 51.0%  |
| ETOH%        | -     | 10.6% | 5.0%         | -      | 15.0% | 10.0%         | 5.0%         | -      | 20.0% | 15.0%         | 10.0%         | 5.0%         | -      | 23.0% | 20.0%        | 15.0%         | 10.0%         | 5.0%         | -      |

Table S6. Modeled fuel blends for France 98 RON

| Oxygen Wt %:            | 0     | 3.7%  |              |        | 5.2%  |               |              |        | 6.9%  |               |               |              |        | 8.0%  |              |               |               |              |        |
|-------------------------|-------|-------|--------------|--------|-------|---------------|--------------|--------|-------|---------------|---------------|--------------|--------|-------|--------------|---------------|---------------|--------------|--------|
| Blend:                  | E0    | E10   | E5ETB<br>E12 | ETBE24 | E15   | E10ETB<br>E11 | E5ETB<br>E22 | ETBE33 | E20   | E15ETB<br>E11 | E10ETB<br>E22 | E5ETB<br>E33 | ETBE44 | E23   | E20ETB<br>E7 | E15ETB<br>E18 | E10ETB<br>E29 | E5ETB<br>E40 | ETBE51 |
| Reformate %             | 13.2% | 55.7% | 47.9%        | 31.5%  | 49.6% | 32.9%         | 26.7%        | 20.4%  | 32.7% | 26.6%         | 20.3%         | 14.0%        | 7.8%   | 28.9% | 25.3%        | 19.0%         | 12.7%         | 6.5%         | 0.2%   |
| Additional Aromatics* % | 22.8% | -     | -            | -      | -     | -             | -            | -      | -     | -             | -             | -            | -      | -     | -            | -             | -             | -            | -      |
| Naphtha %               | -     | 1.1%  | 4.6%         | 2.8%   | 4.5%  | 2.5%          | 6.0%         | 9.5%   | 3.2%  | 6.6%          | 10.1%         | 13.7%        | 17.2%  | 5.7%  | 7.7%         | 11.2%         | 14.7%         | 18.3%        | 21.8%  |
| Other Gas %             | 64.0% | 32.5% | 30.0%        | 42.2%  | 30.9% | 43.5%         | 40.2%        | 36.8%  | 44.1% | 40.8%         | 37.4%         | 34.0%        | 30.7%  | 42.4% | 40.5%        | 37.1%         | 33.7%         | 30.4%        | 27.0%  |
| ETBE %                  | -     | -     | 12.4%        | 23.5%  | -     | 11.0%         | 22.2%        | 33.3%  | -     | 11.0%         | 22.1%         | 33.3%        | 44.4%  | -     | 6.6%         | 17.7%         | 28.8%         | 39.9%        | 51.0%  |
| ETOH%                   |       | 10.6% | 5.0%         | -      | 15.0% | 10.0%         | 5.0%         | -      | 20.0% | 15.0%         | 10.0%         | 5.0%         | -      | 23.0% | 20.0%        | 15.0%         | 10.0%         | 5.0%         | -      |

\* The addition of a high-octane aromatic compound (126.1 RON) was assumed to meet 98 RON target without oxygenate

Table S7. Colombia Case Study Results (g CO<sub>2e</sub> / MJ)

| Oxygen Wt %:          | 3.7% Oxygen |      |         |          |          |          |        |
|-----------------------|-------------|------|---------|----------|----------|----------|--------|
| Blend:                | E0          | E10  | E8ETBE6 | E6ETBE11 | E5ETBE13 | E3ETBE17 | ETBE24 |
| Splash Blend          | -           | -    | 89.5    | 89.3     | 89.3     | 89.4     | 89.3   |
| Match Blend<br>89 RON | 94.0        | 88.1 | 87.4    | 86.9     | 86.7     | 86.2     | 85.5   |

Table S8. Japan Case Study Results (g CO<sub>2e</sub> / MJ).

| Oxygen Wt %:          | 1.3% Oxygen |       | 2.7%   | 3.7% |        |
|-----------------------|-------------|-------|--------|------|--------|
| Blend:                | E0          | ETBE8 | ETBE17 | E10  | ETBE24 |
| Match Blend<br>89 RON | 98.0        | 95.3  | 92.3   | 93.8 | 90.1   |

Table S9. France Case Study Results (g CO<sub>2e</sub> / MJ).

| 95 RON |                 |      |      |      |      |
|--------|-----------------|------|------|------|------|
|        | Weight % Oxygen |      |      |      |      |
| ETBE % | 0%              | 3.7% | 5.2% | 6.9% | 8.0% |
| 0%     | 99.4            | 93.9 | 91.5 | 88.6 | 86.8 |
| 11%    | -               | 92.4 | 90.1 | 87.2 | 86.0 |
| 22%    | -               | 91.0 | 88.7 | 85.7 | 84.5 |
| 33%    | -               | -    | 87.3 | 84.2 | 83.0 |
| 44%    | -               | -    | -    | 83.0 | 81.7 |
| 51%    | -               | -    | -    | -    | 80.3 |
| 98 RON |                 |      |      |      |      |
|        | Weight % Oxygen |      |      |      |      |
| ETBE % | 0%              | 3.7% | 5.2% | 6.9% | 8.0% |
| 0%     | 101.5           | 95.7 | 93.3 | 90.4 | 88.6 |
| 11%    | -               | 94.2 | 91.8 | 89.0 | 87.8 |
| 22%    | -               | 92.7 | 90.4 | 87.5 | 86.3 |
| 33%    | -               | -    | 89.0 | 86.1 | 84.8 |
| 44%    | -               | -    | -    | 84.6 | 83.3 |
| 51%    |                 |      |      |      | 81.8 |

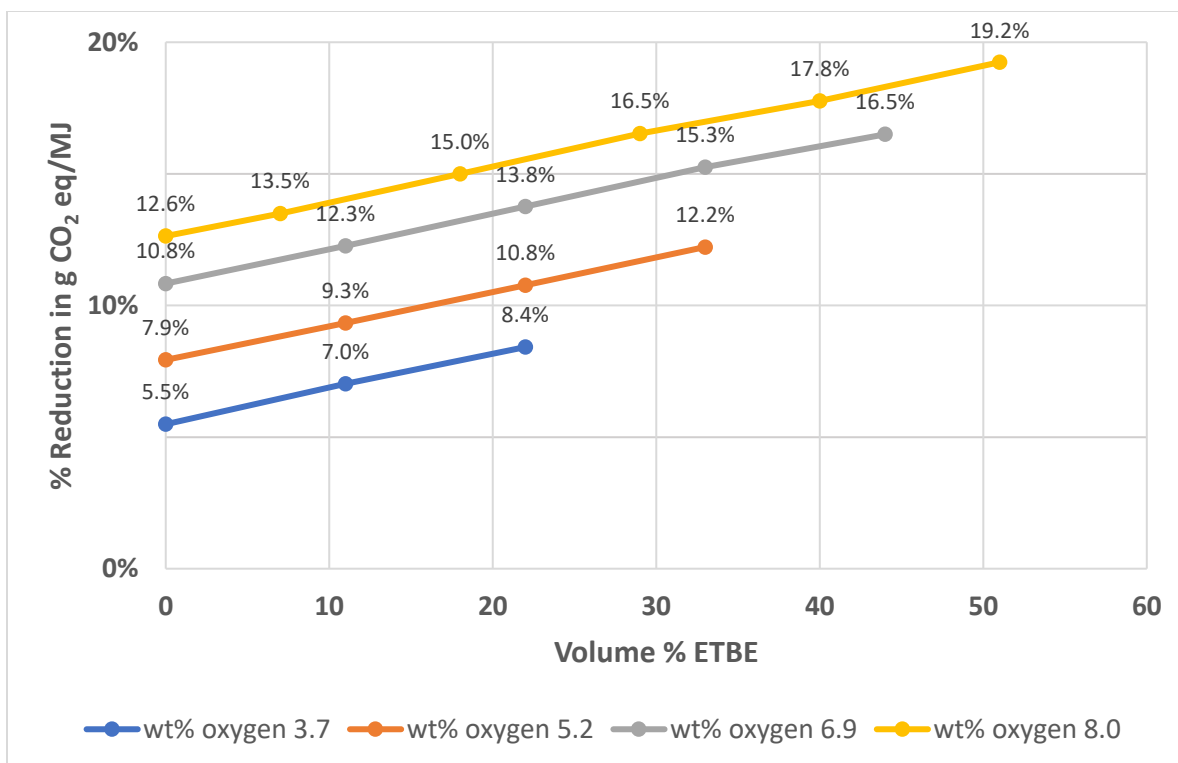

Figure S1. GHG reduction of oxygenated fuels compared to E0 (France 95 RON)

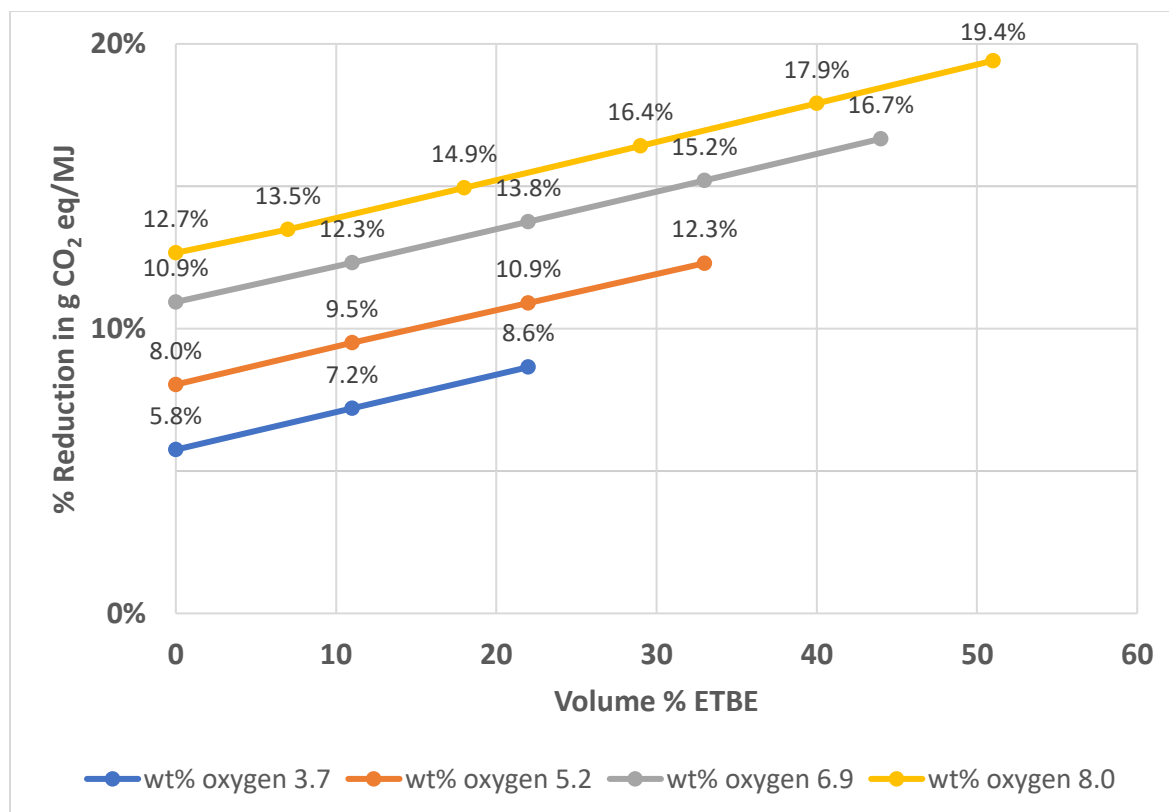

Figure S2. GHG reduction of oxygenated fuels compared to E0 (France 98 RON)

Table S10. Pathway inputs (Colombia sensitivity cases).

|                                                  | 100% Corn     | 100% Sugarcane      |
|--------------------------------------------------|---------------|---------------------|
| Gasoline BOB Production Location                 | US Gulf Coast | US Gulf Coast       |
| ETBE Production Location                         | US Gulf Coast | US Gulf Coast       |
| ETBE Production Pathway                          | TBA Pathway   | TBA Pathway         |
| Ethanol Production Location for ETBE (Primary)   | US Midwest    |                     |
| Ethanol Feedstock for ETBE (Primary)             | US Corn       |                     |
| Pct from Primary Source                          | 100%          | 0%                  |
| Ethanol Production Location for ETBE (Secondary) |               | Cali, Colombia      |
| Ethanol Feedstock for ETBE (Secondary)           |               | Colombian Sugarcane |
| Ethanol Production Location (Primary)            | US Midwest    |                     |
| Ethanol Feedstock                                | US Corn       |                     |
| Pct from Primary Source                          | 100%          | 0%                  |
| Ethanol Production Location (Secondary)          |               | Cali, Colombia      |
| Ethanol Feedstock                                |               | Colombian Sugarcane |
| Blend Location                                   | Colombia      | Colombia            |
| Transport of Product to Consumer                 | Truck         | Truck               |

Table S11. Colombia sensitivity analysis results (g CO<sub>2</sub>e / MJ).

| Blend Case                                  | E0   | E10   | E8ETBE6 | E6ETBE11 | E5ETBE13 | E3ETBE17 | ETBE24 |
|---------------------------------------------|------|-------|---------|----------|----------|----------|--------|
| 100% U.S Corn (Match Blend, 89 RON)         |      |       |         |          |          |          |        |
| g CO <sub>2</sub> e / MJ                    | 94.0 | 89.3  | 88.6    | 88.0     | 87.8     | 87.4     | 86.6   |
| Difference vs. primary case                 | -    | +1.4% | +1.4%   | +1.3%    | +1.3%    | +1.4%    | +1.3%  |
| 100% Brazil Sugarcane (Match Blend, 89 RON) |      |       |         |          |          |          |        |
| g CO <sub>2</sub> e / MJ                    | 94.0 | 87.1  | 86.5    | 85.9     | 85.7     | 85.3     | 84.6   |
| Difference vs. primary case                 | -    | -1.1% | -1.0%   | -1.2%    | -1.2%    | -1.0%    | -1.1%  |
